# Supplementary material for: The Costs and Benefits of Reducing Racial-Ethnic Disparities in Mental Health Care
Source: Atypon-hosted journal article supplement (doi:10.1176/appi.ps.201400070), 2015-01-15
Supplement: appi.ps.201400070.ds001.pdf [file appi.ps.201400070.ds001.pdf]

**Table 1: Characteristics of 2004-2010 Medical Expenditure Panel Survey (N=6206)**

|                                                  | White<br>n=3,111 |               | Black<br>n=1,390 |               |
|--------------------------------------------------|------------------|---------------|------------------|---------------|
| <b>Acute Health Care Expenditures</b>            |                  | \$ (weighted) |                  | \$ (weighted) |
| Inpatient Expenditures                           |                  | \$3,178.68    |                  | \$2,205.62*   |
| Inpatient Mental Health Expenditures             |                  | \$259.38      |                  | \$340.38      |
| Inpatient Physical Health Expenditures           |                  | \$2,919.31    |                  | \$1,865.24*   |
| ER Expenditures                                  |                  | \$263.17      |                  | \$294.53*     |
| ER Mental Health Expenditures                    |                  | \$12.01       |                  | \$19.11*      |
| ER Physical Health Expenditures                  |                  | \$251.16      |                  | \$275.41      |
| <b>Appropriate Mental Health Care Expenditur</b> | unweighted n     | % (weighted)  | unweighted n     | % (weighted)  |
| Any Outpatient Mental Health Care                | 886              | 29.1%         | 215              | 18.4%*        |
| Any Psychotropic Drug Use                        | 1363             | 43.3%         | 295              | 22.7%*        |
| <b>Mental Health Status</b>                      |                  |               |                  |               |
| poor                                             | 280              | 9.6%          | 234              | 17.9%*        |
| fair                                             | 466              | 16.2%         | 247              | 18.5%*        |
| good                                             | 1033             | 32.5%         | 451              | 31.4%         |
| very good                                        | 949              | 29.5%         | 348              | 23.3%*        |
| excellent                                        | 383              | 12.4%         | 110              | 8.8%*         |
| <b>Sociodemographics</b>                         |                  |               |                  |               |
| <b>Age</b>                                       |                  |               |                  |               |
| 18-24                                            | 252              | 9.6%          | 153              | 12.2%*        |
| 25-34                                            | 425              | 14.2%         | 216              | 18.1%*        |
| 35-44                                            | 585              | 19.2%         | 269              | 20.3%         |
| 45-54                                            | 708              | 22.6%         | 321              | 22.2%         |
| 55-64                                            | 570              | 17.6%         | 231              | 15.3%*        |
| 65-74                                            | 267              | 7.6%          | 111              | 6.2%*         |
| 75+                                              | 304              | 9.1%          | 89               | 5.7%*         |
| <b>Gender</b>                                    |                  |               |                  |               |
| Female                                           | 1862             | 58.4%         | 927              | 62.2%*        |
| <b>Marital Status</b>                            |                  |               |                  |               |
| Married                                          | 1447             | 46.6%         | 376              | 26.6%*        |
| <b>Poverty Status</b>                            |                  |               |                  |               |
| Below Poverty Line                               | 811              | 21.0%         | 581              | 40.3%*        |
| Near Poverty                                     | 235              | 6.0%          | 135              | 9.7%*         |
| Low-income                                       | 571              | 18.6%         | 281              | 19.2%         |
| Middle income                                    | 885              | 31.0%         | 302              | 22.4%*        |
| High income                                      | 609              | 23.4%         | 91               | 8.5%*         |
| <b>Education</b>                                 |                  |               |                  |               |
| <HS                                              | 886              | 22.8%         | 529              | 34.5%*        |
| HS Grad                                          | 1165             | 38.7%         | 534              | 38.8%*        |
| Some College                                     | 629              | 22.3%         | 233              | 17.9%*        |
| College Grad                                     | 431              | 16.2%         | 94               | 8.8%*         |
| <b>Health Insurance</b>                          |                  |               |                  |               |
| Private Insurance                                | 1476             | 53.8%         | 453              | 37.5%*        |
| Medicare                                         | 946              | 26.9%         | 354              | 22.4%*        |
| Medicaid                                         | 790              | 20.2%         | 546              | 36.2%*        |
| Uninsured                                        | 491              | 15.9%         | 273              | 19.8%*        |
| <b>Region</b>                                    |                  |               |                  |               |
| Northeast                                        | 423              | 16.6%         | 177              | 14.1%*        |
| Midwest                                          | 867              | 27.8%         | 229              | 17.9%*        |
| South                                            | 1230             | 36.4%         | 872              | 59.6%*        |
| West                                             | 591              | 19.3%         | 112              | 8.5%*         |

<sup>1</sup>Calculations are weighted to be representative of the entire U.S. population  
\* Difference for minority group is significantly different than Whites at  $p < .05$

---

Hispanic  
n=1,705

\$ (weighted)  
\$1,567.45\*  
\$62.13\*  
\$1,505.32\*  
\$181.96\*  
\$19.38\*  
\$162.58\*

| unweighted n | % (weighted) |
|--------------|--------------|
| 310          | 19.2%*       |
| 399          | 24.2%        |
| 246          | 16.5%*       |
| 323          | 19.3%*       |
| 606          | 33.8%        |
| 412          | 23.7%*       |
| 118          | 6.7%*        |
| 191          | 12.3%*       |
| 332          | 21.9%*       |
| 341          | 19.4%        |
| 360          | 20.7%*       |
| 261          | 13.6%*       |
| 129          | 6.8%*        |
| 91           | 5.2%*        |
| 1107         | 60.5%*       |
| 834          | 44.3%*       |
| 634          | 32.4%*       |
| 189          | 9.2%*        |
| 365          | 21.2%*       |
| 393          | 27.2%*       |
| 124          | 10.1%*       |
| 1020         | 50.6%*       |
| 403          | 26.4%*       |
| 195          | 15.6%*       |
| 87           | 7.5%*        |
| 435          | 31.4%*       |
| 319          | 17.7%*       |
| 614          | 30.8%*       |
| 565          | 32.0%*       |
| 257          | 17.7%*       |
| 105          | 6.8%*        |
| 593          | 34.1%*       |
| 750          | 41.4%*       |

---

**Table 2. Racial/ethnic disparities in "appropriate care" (any outpatient mental health care and any psychotropic (N=6206))**

|                                          | Whites |      | Blacks |        | Lati  |
|------------------------------------------|--------|------|--------|--------|-------|
|                                          | Mean   | SD   | Mean   | SD     | Mean  |
| Any Outpatient Mental Health Expenditure | 28.4%  | 0.9% | 20.8%  | 1.2%   | 22.2% |
| Disparity                                |        |      | 7.7%   | 1.6% * | 6.3%  |
| Any Rx Mental Health Expenditure         | 42.5%  | 1.2% | 25.0%  | 1.5%   | 27.6% |
| Disparity                                |        |      | 17.5%  | 2.0% * | 14.9% |

\*Disparity is significant at  $p < .05$

Disparities were calculated applying the IOM definition of racial/ethnic disparities using a rank and replace method adjusts for need variables

Data: 2004-2010 Medical Expenditure Panel Survey

: drug use)

---

inos

SD

1.5%

1.7% \*

1.3%

---

1.6% \*

l that

**Table 3: Predicted Black-white disparities, offset and savings for outpatient mental health care and psychotropic**

|                                                 | Step 1: Disparity Estimation |                                      |                    | Step 2: Offset Estimation |              |
|-------------------------------------------------|------------------------------|--------------------------------------|--------------------|---------------------------|--------------|
|                                                 | Disparity                    | Translate<br>disparity to<br>#people | Cost per<br>capita | Offset per<br>capita      | Significance |
| <b>Any Outpatient Mental Health Expenditure</b> |                              |                                      |                    |                           |              |
| ER expenditure                                  | 7.7%                         | 1,285,003                            | \$113.74           | \$136.95                  | ***          |
| ER Mental Health expenditure                    | 7.7%                         | 1,285,003                            | \$113.74           | \$6.10                    |              |
| ER Physical Health expenditure                  | 7.7%                         | 1,285,003                            | \$113.74           | \$135.25                  | ***          |
| Inpatient expenditure                           | 7.7%                         | 1,285,003                            | \$113.74           | \$762.28                  | ***          |
| Inpatient Mental Health expenditure             | 7.7%                         | 1,285,003                            | \$113.74           | /                         |              |
| Inpatient Physical Health expenditure           | 7.7%                         | 1,285,003                            | \$113.74           | \$540.83                  | ***          |
| <b>Any Psychotropic Drug Expenditure</b>        |                              |                                      |                    |                           |              |
| ER expenditure                                  | 17.5%                        | 2,924,153                            | \$99.20            | \$70.75                   |              |
| ER Mental Health expenditure                    | 17.5%                        | 2,924,153                            | \$99.20            | \$3.49                    |              |
| ER Physical Health expenditure                  | 17.5%                        | 2,924,153                            | \$99.20            | \$72.78                   |              |
| Inpatient expenditure                           | 17.5%                        | 2,924,153                            | \$99.20            | /                         |              |
| Inpatient Mental Health expenditure             | 17.5%                        | 2,924,153                            | \$99.20            | /                         |              |
| Inpatient Physical Health expenditure           | 17.5%                        | 2,924,153                            | \$99.20            | /                         |              |

notes: / means no positive offset value or no significant positive offset value for 500 times bootstrap.

\*\*, \*\*\* denotes significance at the 5% and 1%, respectively

146,156,210.24

|        |            |
|--------|------------|
| white  | 74,246,442 |
| black  | 16,710,570 |
| latino | 17,585,374 |

median expend 306.8

**drug use**

**Step 3: Savings Estimation  
(Disparity\*Offset)**

| <u>Savings per<br/>capita (F-D)</u> | <u>Total_savings<br/>(C*I)</u> | <u>Significance</u> |
|-------------------------------------|--------------------------------|---------------------|
| \$23.21                             | \$29,825,633                   |                     |
| /                                   | /                              |                     |
| \$21.51                             | \$27,641,784                   |                     |
| \$648.54                            | \$833,372,482                  | **                  |
| /                                   | /                              |                     |
| \$427.09                            | \$548,810,761                  | **                  |
| /                                   | /                              |                     |
| /                                   | /                              |                     |
| /                                   | /                              |                     |
| /                                   | /                              |                     |
| /                                   | /                              |                     |

**Table 4: Predicted Latino-white disparities, offset and savings for outpatient mental health care and psychotropic dr**

|                                                 | Step 1: Disparity Estimation |                                      |                    | Step 2: Offset Estimation |              |
|-------------------------------------------------|------------------------------|--------------------------------------|--------------------|---------------------------|--------------|
|                                                 | Disparity                    | Translate<br>disparity to<br>#people | Cost per<br>capita | Offset per<br>capita      | Significance |
| <b>Any Outpatient Mental Health Expenditure</b> |                              |                                      |                    |                           |              |
| ER expenditure                                  | 6.3%                         | 1,104,244                            | \$113.74           | /                         |              |
| ER Mental Health expenditure                    | 6.3%                         | 1,104,244                            | \$113.74           | /                         |              |
| ER Physical Health expenditure                  | 6.3%                         | 1,104,244                            | \$113.74           | /                         |              |
| Inpatient expenditure                           | 6.3%                         | 1,104,244                            | \$113.74           | \$642.33                  | **           |
| Inpatient Mental Health expenditure             | 6.3%                         | 1,104,244                            | \$113.74           | \$26.99                   |              |
| Inpatient Physical Health expenditure           | 6.3%                         | 1,104,244                            | \$113.74           | \$596.69                  | **           |
| <b>Any Psychotropic Drug Expenditure</b>        |                              |                                      |                    |                           |              |
| ER expenditure                                  | 14.9%                        | 2,625,496                            | \$99.20            | /                         |              |
| ER Mental Health expenditure                    | 14.9%                        | 2,626,052                            | \$99.20            | /                         |              |
| ER Physical Health expenditure                  | 14.9%                        | 2,626,052                            | \$99.20            | /                         |              |
| Inpatient expenditure                           | 14.9%                        | 2,626,052                            | \$99.20            | \$697.77                  | **           |
| Inpatient Mental Health expenditure             | 14.9%                        | 2,626,052                            | \$99.20            | \$34.62                   |              |
| Inpatient Physical Health expenditure           | 14.9%                        | 2,626,052                            | \$99.20            | \$662.89                  | **           |

notes:/ means no positive value or no significant positive value for 500 times bootstrap.

\*, \*\*, \*\*\* means 10%,5%,1%,significant by bootstrap

|        |            |
|--------|------------|
| white  | 74,246,442 |
| black  | 16,710,570 |
| latino | 17,585,374 |



Drug use

---

**Step 3: Savings Estimation  
(Disparity\*Offset)**

| <u>Savings per</u><br><u>capita (F-D)</u> | <u>Total_savings</u><br><u>(C*I)</u> | <u>Significance</u> |
|-------------------------------------------|--------------------------------------|---------------------|
| /                                         | /                                    |                     |
| /                                         | /                                    |                     |
| /                                         | /                                    |                     |
| \$528.59                                  | \$583,690,028                        | **                  |
| /                                         | /                                    |                     |
| \$482.95                                  | \$533,295,096                        | **                  |
| /                                         | /                                    |                     |
| /                                         | /                                    |                     |
| /                                         | /                                    |                     |
| \$598.57                                  | \$1,571,866,592                      | **                  |
| /                                         | /                                    |                     |
| \$563.69                                  | \$1,480,273,153                      | **                  |

---

**Appendix Table 1. Racial/ethnic disparities in any psychotropic drug use, any outpatient mental health care. Multivariate method, adjusting for need variables in MEPS) (N=6206)**

|                                                                   | Whites |       | Mean   |
|-------------------------------------------------------------------|--------|-------|--------|
|                                                                   | Mean   | SD    |        |
| Any Outpatient Mental Health Expenditure                          | 28.45% | 0.92% | 20.76% |
| Any Outpatient Mental Health Expenditure with Medicare            | 28.32% | 1.43% | 21.70% |
| Any Outpatient Mental Health Expenditure with Medicaid            | 41.98% | 1.86% | 33.92% |
| Any Outpatient Mental Health Expenditure with Private Insurance   | 27.53% | 1.20% | 18.61% |
| Any Outpatient Mental Health Expenditure without Insurance        | 18.56% | 1.79% | 14.34% |
| Any Outpatient Mental Health Expenditure with Diabete             | 28.52% | 1.78% | 23.20% |
| Any Outpatient Mental Health Expenditure with Asthma              | 35.08% | 1.83% | 25.59% |
| Any Outpatient Mental Health Expenditure with High Blood Pressure | 28.56% | 1.64% | 22.36% |
| Any Outpatient Mental Health Expenditure with Heart Disease       | 26.97% | 1.77% | 18.06% |
| Any Rx Mental Health Expenditure                                  | 42.49% | 1.20% | 24.99% |
| Any Rx Mental Health Expenditure with Medicare                    | 47.47% | 1.65% | 30.39% |
| Any Rx Mental Health Expenditure with Medicaid                    | 54.40% | 1.62% | 40.42% |
| Any Rx Mental Health Expenditure with Private Insurance           | 42.22% | 1.36% | 21.43% |
| Any Rx Mental Health Expenditure without Insurance                | 29.20% | 2.52% | 13.73% |
| Any Rx Mental Health Expenditure with Diabete                     | 47.07% | 1.76% | 30.41% |
| Any Rx Mental Health Expenditure with Asthma                      | 51.26% | 2.22% | 34.54% |
| Any Rx Mental Health Expenditure with High Blood Pressure         | 46.73% | 2.30% | 27.97% |
| Any Rx Mental Health Expenditure with Heart Disease               | 47.02% | 2.67% | 26.02% |

\*Disparity is significant at p<.05

ethod used was IOM-concordant (rank and replace

| Blacks |           |         | Latinos |       |           |         |
|--------|-----------|---------|---------|-------|-----------|---------|
| SD     | Disparity | SD      | Mean    | SD    | Disparity | SD      |
| 1.23%  | 7.69%     | 1.56% * | 22.17%  | 1.53% | 6.28%     | 1.73% * |
| 2.46%  | 6.62%     | 2.87% * | 29.66%  | 2.70% | -1.34%    | 2.79%   |
| 2.93%  | 8.06%     | 3.43% * | 37.80%  | 2.32% | 4.18%     | 2.66% * |
| 2.24%  | 8.93%     | 2.22% * | 23.34%  | 2.67% | 4.19%     | 2.68% * |
| 3.41%  | 4.23%     | 3.92% * | 8.88%   | 2.20% | 9.68%     | 2.73% * |
| 3.01%  | 5.31%     | 2.90% * | 23.53%  | 2.39% | 4.99%     | 2.51% * |
| 1.67%  | 9.49%     | 2.45% * | 29.40%  | 3.67% | 5.68%     | 4.16% * |
| 1.84%  | 6.20%     | 2.51% * | 24.36%  | 1.89% | 4.20%     | 2.56% * |
| 3.57%  | 8.91%     | 3.31% * | 24.79%  | 4.10% | 2.19%     | 4.80% * |
| 1.48%  | 17.50%    | 2.05% * | 27.55%  | 1.27% | 14.93%    | 1.60% * |
| 2.35%  | 17.08%    | 3.24% * | 41.83%  | 2.72% | 5.63%     | 2.74% * |
| 3.06%  | 13.98%    | 3.13% * | 40.82%  | 2.16% | 13.58%    | 2.97% * |
| 2.60%  | 20.80%    | 2.83% * | 30.77%  | 2.65% | 11.45%    | 2.50% * |
| 2.54%  | 15.47%    | 3.95% * | 12.77%  | 2.43% | 16.43%    | 3.70% * |
| 2.50%  | 16.67%    | 2.48% * | 28.19%  | 2.30% | 18.89%    | 2.36% * |
| 2.39%  | 16.72%    | 3.20% * | 34.59%  | 3.34% | 16.67%    | 4.23% * |
| 1.68%  | 18.76%    | 2.91% * | 31.36%  | 1.54% | 15.37%    | 2.67% * |
| 2.61%  | 21.00%    | 4.06% * | 31.94%  | 3.83% | 15.08%    | 4.65% * |

**Appendix Table 2: Generalized Linear Model Results for Different Dependent Variables**

|                                                   | Year 2 ER Physical Health<br>Expenditure(N=6206) |       | Year 2 ER Mental Health<br>Expenditure(N=6206) |       |
|---------------------------------------------------|--------------------------------------------------|-------|------------------------------------------------|-------|
|                                                   | Coefficient                                      | se    | Coefficient                                    | se    |
| Any Year 1 outpatient mental health expenditure   | 0.151                                            | 0.169 | -0.244                                         | 0.558 |
| Black                                             | 0.217                                            | 0.170 | 0.586                                          | 0.531 |
| Hispanic                                          | -0.388 *                                         | 0.175 | 0.485                                          | 0.424 |
| Black*Any outpatient mental health expenditure    | -0.76 *                                          | 0.281 | -0.549                                         | 0.733 |
| Hispanic*Any outpatient mental health expenditure | -0.055                                           | 0.354 | 0.568                                          | 0.613 |
| Age                                               | -0.11 *                                          | 0.040 | -0.119                                         | 0.134 |
| female                                            | 0.134                                            | 0.119 | 0.436                                          | 0.462 |
| PCS                                               | -0.013 *                                         | 0.006 | 0.007                                          | 0.024 |
| MCS                                               | 0.010                                            | 0.008 | 0.016                                          | 0.026 |
| Self-reported MH                                  | 0.080                                            | 0.064 | -0.018                                         | 0.156 |
| K6                                                | 0.023                                            | 0.016 | 0.010                                          | 0.038 |
| PHQ-2                                             | 0.011                                            | 0.050 | 0.119                                          | 0.225 |
| Any limitation of activity                        | -0.147                                           | 0.133 | -0.226                                         | 0.461 |
| Self-reported physical health                     | -0.251                                           | 0.156 | -0.348                                         | 0.425 |
| Any Comorbid physical health disorder             | 0.732 *                                          | 0.197 | -1.157 *                                       | 0.515 |
| BMI                                               | 0.006                                            | 0.008 | -0.003                                         | 0.021 |
| Diabetes                                          | 0.103                                            | 0.155 | -0.080                                         | 0.385 |
| Asthma                                            | 0.242                                            | 0.137 | 0.989 *                                        | 0.458 |
| High Blood Pressure                               | -0.291                                           | 0.154 | 0.266                                          | 0.363 |
| CHD                                               | -0.172                                           | 0.277 | 0.136                                          | 0.617 |
| Angina                                            | 0.028                                            | 0.333 | -1.109                                         | 0.621 |
| MI                                                | 0.259                                            | 0.268 | 2.335 *                                        | 0.556 |
| Stroke                                            | 0.002                                            | 0.221 | -0.628                                         | 0.577 |
| Emphysema                                         | -0.252                                           | 0.290 | -2.367 *                                       | 0.839 |
| Arthritis                                         | 0.018                                            | 0.135 | 0.675                                          | 0.367 |
| Other Heart Disease                               | -0.092                                           | 0.198 | 0.484                                          | 0.505 |
| Any service use with a MH diagnosis               | -0.257                                           | 0.223 | 4.956 *                                        | 0.668 |
| Constant                                          | 5.135 *                                          | 0.691 | -1.041                                         | 3.047 |

|                                           | Year 2 ER Physical Health<br>Expenditure(N=6206) |       | Year 2 ER Mental Health<br>Expenditure(N=6206) |       |
|-------------------------------------------|--------------------------------------------------|-------|------------------------------------------------|-------|
|                                           | Coefficient                                      | se    | Coefficient                                    | se    |
| Any Year 1 Rx mental health expenditure   | 0.120                                            | 0.159 | -0.700                                         | 0.701 |
| Black                                     | 0.195                                            | 0.190 | 0.070                                          | 0.695 |
| Hispanic                                  | -0.386 *                                         | 0.192 | 0.133                                          | 0.575 |
| Black*Any Rx mental health expenditure    | -0.411                                           | 0.270 | 0.274                                          | 0.855 |
| Hispanic*Any Rx mental health expenditure | -0.017                                           | 0.318 | 0.878                                          | 0.741 |
| Age                                       | -0.111 *                                         | 0.040 | -0.121                                         | 0.144 |
| female                                    | 0.126                                            | 0.121 | 0.472                                          | 0.514 |
| PCS                                       | -0.013 *                                         | 0.006 | 0.008                                          | 0.023 |
| MCS                                       | 0.009                                            | 0.008 | 0.016                                          | 0.026 |
| Self-reported MH                          | 0.079                                            | 0.064 | -0.033                                         | 0.156 |
| K6                                        | 0.022                                            | 0.016 | 0.008                                          | 0.034 |
| PHQ-2                                     | 0.010                                            | 0.050 | 0.142                                          | 0.211 |
| Any limitation of activity                | -0.147                                           | 0.133 | -0.188                                         | 0.412 |
| Self-reported physical health             | -0.248                                           | 0.157 | -0.411                                         | 0.442 |
| Any Comorbid physical health disorder     | 0.735 *                                          | 0.200 | -1.222 *                                       | 0.471 |
| BMI                                       | 0.006                                            | 0.008 | -0.002                                         | 0.020 |

|                                     |        |       |        |   |        |
|-------------------------------------|--------|-------|--------|---|--------|
| Diabetes                            | 0.103  | 0.156 | -0.226 |   | 0.421  |
| Asthma                              | 0.243  | 0.137 | 1.008  | * | 0.429  |
| High Blood Pressure                 | -0.297 | 0.155 | 0.248  |   | 0.375  |
| CHD                                 | -0.170 | 0.278 | -0.077 |   | 0.606  |
| Angina                              | 0.028  | 0.333 | -1.012 |   | 0.573  |
| MI                                  | 0.259  | 0.267 | 2.443  | * | 0.564  |
| Stroke                              | -0.003 | 0.221 | -0.673 |   | 0.584  |
| Emphysema                           | -0.250 | 0.290 | -2.253 | * | 0.751  |
| Arthritis                           | 0.021  | 0.135 | 0.744  |   | 0.386  |
| Other Heart Disease                 | -0.090 | 0.197 | 0.550  |   | 0.541  |
| Any service use with a MH diagnosis | -0.262 | 0.220 | 5.08   | * | 0.761  |
| Constant                            | 5.162  | *     | 0.690  |   | -0.784 |
|                                     |        |       |        |   | 2.993  |

---

Data: Panels 9-14 (2004-2010) Medical Expenditure Panel Survey

All covariates are drawn from Year 1 of the Panel Data

The GLM that was found to best fit the data has a log link and residual variance proportional to mean squared

| Year 2 ER<br>Expenditure(N=6206) |       | Year 2 Inpatient Physical<br>Health<br>Expenditure(N=6206) |        | Year 2 Inpatient Mental<br>Health<br>Expenditure(N=6206) |        | Year 2 Inp<br>Expenditure(C |
|----------------------------------|-------|------------------------------------------------------------|--------|----------------------------------------------------------|--------|-----------------------------|
| Coefficient                      | se    | Coefficient                                                | se     | Coefficient                                              | se     | Coefficient                 |
| 0.120                            | 0.168 | 0.260                                                      | 0.193  | -0.767                                                   | 0.539  | 0.168                       |
| 0.218                            | 0.168 | -0.268                                                     | 0.185  | 0.120                                                    | 1.140  | -0.276                      |
| -0.367                           | *     | 0.170                                                      | -0.354 | 0.187                                                    | -0.943 | 0.821                       |
| -0.714                           | *     | 0.272                                                      | -0.573 | 0.368                                                    | -1.215 | 1.563                       |
| 0.042                            | 0.333 | -0.652                                                     | 0.381  | 0.249                                                    | 1.260  | -0.576                      |
| -0.108                           | *     | 0.040                                                      | 0.195  | *                                                        | 0.042  | -0.195                      |
| 0.143                            | 0.117 | 0.216                                                      | 0.136  | -0.085                                                   | 0.510  | 0.219                       |
| -0.013                           | *     | 0.006                                                      | -0.036 | *                                                        | 0.007  | 0.028*                      |
| 0.010                            | 0.008 | -0.002                                                     | 0.008  | -0.045                                                   | 0.035  | -0.005                      |
| 0.076                            | 0.063 | 0.034                                                      | 0.067  | 0.079                                                    | 0.194  | 0.042                       |
| 0.023                            | 0.015 | 0.008                                                      | 0.016  | -0.105                                                   | 0.070  | 0.003                       |
| 0.012                            | 0.049 | -0.032                                                     | 0.060  | 0.657                                                    | 0.342  | -0.006                      |
| -0.141                           | 0.131 | 0.253                                                      | 0.134  | 0.219                                                    | 0.392  | 0.26                        |
| -0.262                           | 0.152 | -0.070                                                     | 0.146  | 0.174                                                    | 0.922  | -0.029                      |
| 0.691                            | *     | 0.192                                                      | -0.004 | 0.250                                                    | 0.622  | 0.520                       |
| 0.006                            | 0.008 | 0.013                                                      | 0.009  | 0.014                                                    | 0.018  | 0.013                       |
| 0.095                            | 0.153 | 0.417                                                      | *      | 0.179                                                    | -0.023 | 0.552                       |
| 0.255                            | 0.135 | -0.084                                                     | 0.193  | -0.748                                                   | 0.588  | -0.101                      |
| -0.285                           | 0.151 | -0.045                                                     | 0.167  | 0.276                                                    | 0.444  | -0.052                      |
| -0.191                           | 0.274 | -0.340                                                     | 0.329  | 0.329                                                    | 0.619  | -0.331                      |
| 0.002                            | 0.328 | 0.263                                                      | 0.306  | -0.915                                                   | 0.764  | 0.250                       |
| 0.310                            | 0.265 | 0.076                                                      | 0.318  | -1.014                                                   | 1.033  | 0.076                       |
| 0.005                            | 0.219 | 0.031                                                      | 0.277  | 1.324                                                    | 1.069  | 0.061                       |
| -0.284                           | 0.289 | -0.148                                                     | 0.280  | 0.547                                                    | 0.524  | -0.142                      |
| 0.034                            | 0.132 | 0.213                                                      | 0.161  | -0.000                                                   | 0.406  | 0.210                       |
| -0.080                           | 0.195 | 0.086                                                      | 0.204  | -0.439                                                   | 0.579  | 0.058                       |
| 0.286                            | 0.176 | 0.419                                                      | 0.321  | 4.291                                                    | *      | 0.899                       |
| 5.143                            | *     | 0.677                                                      | 7.305  | *                                                        | 0.678  | 2.058                       |
|                                  |       |                                                            |        |                                                          |        | 3.389                       |
|                                  |       |                                                            |        |                                                          |        | 7.331                       |

| Year 2 ER<br>Expenditure(N=6206) |       | Year 2 Inpatient Physical<br>Health<br>Expenditure(N=6206) |        | Year 2 Inpatient Mental<br>Health<br>Expenditure(N=6206) |        | Year 2 Inp<br>Expenditure(C |        |       |
|----------------------------------|-------|------------------------------------------------------------|--------|----------------------------------------------------------|--------|-----------------------------|--------|-------|
| Coefficient                      | se    | Coefficient                                                | se     | Coefficient                                              | se     | Coefficient                 |        |       |
| 0.102                            | 0.158 | 0.311                                                      | 0.164  | -1.557                                                   | *      | 0.529                       | 0.211  |       |
| 0.193                            | 0.188 | -0.315                                                     | 0.202  | -3.864                                                   | *      | 1.355                       | -0.386 |       |
| -0.366                           | *     | 0.187                                                      | -0.245 | 0.204                                                    | -1.486 | 0.785                       | -0.305 |       |
| -0.376                           | 0.261 | -0.094                                                     | 0.343  | 4.877                                                    | *      | 1.616                       | 0.031  |       |
| 0.059                            | 0.303 | -0.74                                                      | *      | 0.339                                                    | 0.828  | 1.388                       | -0.647 |       |
| -0.109                           | *     | 0.039                                                      | 0.194  | *                                                        | 0.043  | -0.108                      | 0.271  |       |
| 0.136                            | 0.119 | 0.199                                                      | 0.136  | -0.004                                                   | 0.502  | 0.502                       | 0.204  |       |
| -0.013                           | *     | 0.006                                                      | -0.036 | *                                                        | 0.007  | 0.036                       | *      | 0.013 |
| 0.010                            | 0.008 | -0.001                                                     | 0.008  | -0.031                                                   | 0.036  | -0.005                      | -0.005 |       |
| 0.074                            | 0.062 | 0.029                                                      | 0.069  | -0.047                                                   | 0.164  | 0.034                       | 0.034  |       |
| 0.023                            | 0.015 | 0.007                                                      | 0.015  | -0.089                                                   | 0.055  | 0.002                       | 0.002  |       |
| 0.012                            | 0.049 | -0.034                                                     | 0.060  | 0.749                                                    | *      | 0.276                       | -0.005 |       |
| -0.141                           | 0.131 | 0.248                                                      | 0.133  | 0.305                                                    | 0.368  | 0.254                       | *      |       |
| -0.259                           | 0.153 | -0.062                                                     | 0.146  | -0.032                                                   | 1.082  | -0.022                      | -0.022 |       |
| 0.692                            | *     | 0.194                                                      | -0.021 | 0.253                                                    | 0.171  | 0.470                       | 0.007  |       |
| 0.005                            | 0.008 | 0.012                                                      | 0.009  | 0.020                                                    | 0.017  | 0.012                       | 0.012  |       |

|        |       |         |       |         |       |         |
|--------|-------|---------|-------|---------|-------|---------|
| 0.097  | 0.154 | 0.425 * | 0.179 | -0.050  | 0.456 | 0.414 * |
| 0.256  | 0.135 | -0.086  | 0.192 | -0.571  | 0.480 | -0.103  |
| -0.289 | 0.152 | -0.040  | 0.168 | 0.282   | 0.405 | -0.046  |
| -0.190 | 0.274 | -0.342  | 0.330 | 0.400   | 0.769 | -0.330  |
| 0.003  | 0.328 | 0.264   | 0.307 | -0.881  | 0.768 | 0.254   |
| 0.309  | 0.264 | 0.079   | 0.315 | -1.077  | 1.199 | 0.077   |
| 0.001  | 0.219 | 0.030   | 0.274 | 1.628   | 1.435 | 0.061   |
| -0.283 | 0.289 | -0.143  | 0.283 | 0.532   | 0.649 | -0.140  |
| 0.036  | 0.132 | 0.214   | 0.162 | 0.130   | 0.389 | 0.211   |
| -0.078 | 0.194 | 0.082   | 0.203 | -0.424  | 0.561 | 0.054   |
| 0.277  | 0.171 | 0.385   | 0.322 | 4.483 * | 0.984 | 0.885 * |
| 5.17 * | 0.677 | 7.298 * | 0.681 | 1.032   | 3.458 | 7.343 * |

---

---

patient

N=6206)

se

0.208  
0.184  
0.186  
0.356  
0.372  
0.042  
0.135  
0.007  
0.009  
0.066  
0.016  
0.062  
0.130  
0.142  
0.237  
0.009  
0.175  
0.190  
0.165  
0.329  
0.303  
0.319  
0.274  
0.280  
0.155  
0.201  
0.302  
0.669

-0.376

---

---

patient

N=6206)

se

0.180  
0.204  
0.204  
0.333  
0.335  
0.042  
0.136  
0.007  
0.008  
0.068  
0.016  
0.063  
0.130  
0.143  
0.239  
0.009



0.174  
0.189  
0.166  
0.331  
0.303  
0.316  
0.272  
0.283  
0.155  
0.200  
0.302  
0.672

---

**Appendix Table 3: Predicted offset and savings realized from the elimination of Black-white disparities in appro**

|                                                 | offset     | significance | disparity | average xp |
|-------------------------------------------------|------------|--------------|-----------|------------|
| <b>Any Outpatient Mental Health Expenditure</b> |            |              |           |            |
| ER expenditure with Medicare                    | /          |              | 6.62%     | \$118.43   |
| ER expenditure with Medicaid                    | \$255.15   | ***          | 8.06%     | \$118.43   |
| ER expenditure with Private Insurance           | \$153.81   | ***          | 8.93%     | \$118.43   |
| ER expenditure without Insurance                | /          |              | 4.23%     | \$118.43   |
| ER expenditure with Diabete                     | \$60.29    | **           | 5.31%     | \$118.43   |
| ER expenditure with Asthma                      | \$177.79   | ***          | 9.49%     | \$118.43   |
| ER expenditure with High Blood Pressure         | \$89.51    | **           | 6.20%     | \$118.43   |
| ER expenditure with Heart Disease               | \$198.74   | ***          | 8.91%     | \$118.43   |
|                                                 |            |              |           |            |
| Inpatient expenditure with Medicare             | \$1,859.99 | ***          | 6.62%     | \$118.43   |
| Inpatient expenditure with Medicaid             | \$2,202.79 | ***          | 8.06%     | \$118.43   |
| Inpatient expenditure with Private Insurance    | /          |              | 8.93%     | \$118.43   |
| Inpatient expenditure without Insurance         | /          |              | 4.23%     | \$118.43   |
| Inpatient expenditure with Diabete              | \$392.91   | **           | 5.31%     | \$118.43   |
| Inpatient expenditure with Asthma               | /          |              | 9.49%     | \$118.43   |
| Inpatient expenditure with High Blood Pressure  | \$622.36   | ***          | 6.20%     | \$118.43   |
| Inpatient expenditure with Heart Disease        | \$2,245.16 | ***          | 8.91%     | \$118.43   |
|                                                 |            |              |           |            |
| <b>Any Psychotropic Drug Expenditure</b>        |            |              |           |            |
| ER expenditure with Medicare                    | \$100.82   |              | 17.08%    | \$99.73    |
| ER expenditure with Medicaid                    | \$252.57   |              | 13.98%    | \$99.73    |
| ER expenditure with Private Insurance           | /          |              | 20.80%    | \$99.73    |
| ER expenditure without Insurance                | /          |              | 15.47%    | \$99.73    |
| ER expenditure with Diabete                     | /          |              | 16.67%    | \$99.73    |
| ER expenditure with Asthma                      | \$84.20    |              | 16.72%    | \$99.73    |
| ER expenditure with High Blood Pressure         | \$80.62    |              | 18.76%    | \$99.73    |
| ER expenditure with Heart Disease               | \$230.95   |              | 21.00%    | \$99.73    |
|                                                 |            |              |           |            |
| Inpatient expenditure with Medicare             | \$1,106.48 |              | 17.08%    | \$99.73    |
| Inpatient expenditure with Medicaid             | \$200.97   |              | 13.98%    | \$99.73    |
| Inpatient expenditure with Private Insurance    | /          |              | 20.80%    | \$99.73    |
| Inpatient expenditure without Insurance         | /          |              | 15.47%    | \$99.73    |
| Inpatient expenditure with Diabete              | \$1,016.26 |              | 16.67%    | \$99.73    |
| Inpatient expenditure with Asthma               | \$755.90   |              | 16.72%    | \$99.73    |
| Inpatient expenditure with High Blood Pressure  | /          |              | 18.76%    | \$99.73    |
| Inpatient expenditure with Heart Disease        | \$3,130.38 |              | 21.00%    | \$99.73    |

notes:/ means no positive value or no significant positive value for 500 times bootstrap.

\*,\*\*,\*\*\* means 10%,5%,1%,significant by bootstrap

**private mental health care.**

| total population | #people to eliminate disparity | Per_Savings | Total_savings   | significance |
|------------------|--------------------------------|-------------|-----------------|--------------|
| 3,720,817        | 246,272                        | /           | /               |              |
| 5,970,219        | 481,361                        | \$136.72    | \$65,810,986    | ***          |
| 6,257,917        | 558,555                        | \$35.38     | \$19,761,092    | ***          |
| 3,375,958        | 142,688                        | /           | /               |              |
| 4,716,868        | 250,671                        |             |                 |              |
| 4,827,451        | 458,345                        | \$59.36     | \$27,207,199    | ***          |
| 7,902,364        | 489,984                        |             |                 |              |
| 1,879,905        | 167,478                        | \$80.31     | \$13,450,341    | ***          |
| 3,720,817        | 246,272                        | \$1,741.56  | \$428,898,439   | ***          |
| 5,970,219        | 481,361                        | \$2,084.36  | \$1,003,327,322 | ***          |
| 6,257,917        | 558,555                        | /           | /               |              |
| 3,375,958        | 142,688                        | /           | /               |              |
| 4,716,868        | 250,671                        | \$274.48    | \$68,805,397    | **           |
| 4,827,451        | 458,345                        | /           | /               |              |
| 7,902,364        | 489,984                        | \$503.93    | \$246,919,607   | ***          |
| 1,879,905        | 167,478                        | \$2,126.73  | \$356,181,645   | ***          |
| 3,720,817        | 635,556                        | /           | /               |              |
| 5,970,219        | 834,499                        | \$152.84    | \$127,546,801   |              |
| 6,257,917        | 1,301,483                      | /           | /               |              |
| 3,375,958        | 522,161                        | /           | /               |              |
| 4,716,868        | 786,071                        | /           | /               |              |
| 4,827,451        | 807,257                        | /           | /               |              |
| 7,902,364        | 1,482,706                      | /           | /               |              |
| 1,879,905        | 394,785                        | \$131.22    | \$51,802,698    |              |
| 3,720,817        | 635,556                        | \$1,006.75  | \$639,844,960   |              |
| 5,970,219        | 834,499                        | \$101.24    | \$84,481,102    |              |
| 6,257,917        | 1,301,483                      | /           | /               |              |
| 3,375,958        | 522,161                        | /           | /               |              |
| 4,716,868        | 786,071                        | \$916.53    | \$720,461,019   |              |
| 4,827,451        | 807,257                        | /           | /               |              |
| 7,902,364        | 1,482,706                      |             | \$0             |              |
| 1,879,905        | 394,785                        | \$3,030.65  | \$1,196,457,295 |              |

**Appendix Table 4: Predicted offset and savings realized from the elimination of Latino-white disparities in approp**

|                                                 | offset     | significance disparity | average xp |
|-------------------------------------------------|------------|------------------------|------------|
| <b>Any Outpatient Mental Health Expenditure</b> |            |                        |            |
| ER expenditure with Medicare                    | /          |                        |            |
| ER expenditure with Medicaid                    | /          | 4.18%                  | \$118.43   |
| ER expenditure with Private Insurance           | /          | 4.19%                  | \$118.43   |
| ER expenditure without Insurance                | /          | 9.68%                  | \$118.43   |
| ER expenditure with Diabete                     | /          | 4.99%                  | \$118.43   |
| ER expenditure with Asthma                      | /          | 5.68%                  | \$118.43   |
| ER expenditure with High Blood Pressure         | /          | 4.20%                  | \$118.43   |
| ER expenditure with Heart Disease               | \$42.31    | 2.19%                  | \$118.43   |
|                                                 |            |                        |            |
| Inpatient expenditure with Medicare             |            |                        |            |
| Inpatient expenditure with Medicaid             | \$1,272.89 | 4.18%                  | \$118.43   |
| Inpatient expenditure with Private Insurance    | \$158.86   | 4.19%                  | \$118.43   |
| Inpatient expenditure without Insurance         | /          | 9.68%                  | \$118.43   |
| Inpatient expenditure with Diabete              | \$1,350.56 | 4.99%                  | \$118.43   |
| Inpatient expenditure with Asthma               | \$647.46   | 5.68%                  | \$118.43   |
| Inpatient expenditure with High Blood Pressure  | \$767.35   | 4.20%                  | \$118.43   |
| Inpatient expenditure with Heart Disease        | \$655.04   | 2.19%                  | \$118.43   |
|                                                 |            |                        |            |
| <b>Any Psychotropic Drug Expenditure</b>        |            |                        |            |
| ER expenditure with Medicare                    | \$38.63    | 5.63%                  | \$99.73    |
| ER expenditure with Medicaid                    | \$22.28    | 13.58%                 | \$99.73    |
| ER expenditure with Private Insurance           | /          | 11.45%                 | \$99.73    |
| ER expenditure without Insurance                | /          | 16.43%                 | \$99.73    |
| ER expenditure with Diabete                     | /          | 18.89%                 | \$99.73    |
| ER expenditure with Asthma                      | /          | 16.67%                 | \$99.73    |
| ER expenditure with High Blood Pressure         | /          | 15.37%                 | \$99.73    |
| ER expenditure with Heart Disease               | \$42.48    | 15.08%                 | \$99.73    |
|                                                 |            |                        |            |
| Inpatient expenditure with Medicare             | \$1,698.34 | 5.63%                  | \$99.73    |
| Inpatient expenditure with Medicaid             | \$1,117.34 | 13.58%                 | \$99.73    |
| Inpatient expenditure with Private Insurance    | \$127.49   | 11.45%                 | \$99.73    |
| Inpatient expenditure without Insurance         | /          | 16.43%                 | \$99.73    |
| Inpatient expenditure with Diabete              | \$1,656.14 | 18.89%                 | \$99.73    |
| Inpatient expenditure with Asthma               | \$528.34   | 16.67%                 | \$99.73    |
| Inpatient expenditure with High Blood Pressure  | \$676.73   | 15.37%                 | \$99.73    |
| Inpatient expenditure with Heart Disease        | \$566.58   | 15.08%                 | \$99.73    |

notes:/ means no positive value or no significant positive value for 500 times bootstrap.

\*,\*\*,\*\*\* means 10%,5%,1%,significant by bootstrap

**riate mental health care.**

---

| total population | #people to eliminate disparity | Per_Savings | Total_savings   | significance |
|------------------|--------------------------------|-------------|-----------------|--------------|
|                  |                                | /           | /               |              |
| 5,319,824        | 222,248                        | /           | /               |              |
| 5,558,885        | 232,951                        | /           | /               |              |
| 5,683,308        | 550,125                        | /           | /               |              |
| 4,998,576        | 249,537                        | /           | /               |              |
| 4,186,790        | 237,762                        | /           | /               |              |
| 6,653,628        | 279,446                        | /           | /               |              |
| 1,487,528        | 32,522                         | /           | /               |              |
|                  |                                | /           | /               |              |
| 5,319,824        | 222,248                        | \$1,154.46  | \$256,576,780   |              |
| 5,558,885        | 232,951                        | \$40.43     | \$9,417,672     |              |
| 5,683,308        | 550,125                        | /           | /               |              |
| 4,998,576        | 249,537                        | \$1,232.13  | \$307,462,214   |              |
| 4,186,790        | 237,762                        | \$529.03    | \$125,784,226   |              |
| 6,653,628        | 279,446                        | \$648.92    | \$181,338,145   |              |
| 1,487,528        | 32,522                         | \$536.61    | \$17,451,678    |              |
|                  |                                | /           | /               |              |
| 3,108,519        | 175,140                        | /           | /               |              |
| 5,319,824        | 722,235                        | /           | /               |              |
| 5,558,885        | 636,671                        | /           | /               |              |
| 5,683,308        | 933,873                        | /           | /               |              |
| 4,998,576        | 944,075                        | /           | /               |              |
| 4,186,790        | 697,783                        | /           | /               |              |
| 6,653,628        | 1,022,927                      | /           | /               |              |
| 1,487,528        | 224,366                        | /           | /               |              |
|                  |                                | /           | /               |              |
| 3,108,519        | 175,140                        | \$1,598.61  | \$279,982,037   |              |
| 5,319,824        | 722,235                        | \$1,017.61  | \$734,952,962   |              |
| 5,558,885        | 636,671                        | \$27.76     | \$17,675,747    |              |
| 5,683,308        | 933,873                        | /           | /               |              |
| 4,998,576        | 944,075                        | \$1,556.41  | \$1,469,365,678 |              |
| 4,186,790        | 697,783                        | \$428.61    | \$299,075,722   |              |
| 6,653,628        | 1,022,927                      | \$577.00    | \$590,225,822   |              |
| 1,487,528        | 224,366                        | \$466.85    | \$104,744,905   |              |

---
